# Supplementary material for: Assimilation or Contrast? Status Inequality, Judgment of Product Quality, and Product Choices in Markets
Source: Atypon-hosted journal article supplement (doi:10.1287/orsc.2015.1007), 2015-10-09
Supplement: orsc.2015.1007-sm.pdf [file orsc.2015.1007-sm.pdf]

## APPENDIX A Rank-Order Logic Model of Football Teams' AP Ranks (Week<sub>t</sub>)<sup>ab</sup>

| Variables                                                                                       | Model 1            |
|-------------------------------------------------------------------------------------------------|--------------------|
| <b>Performance (win-loss) influence</b>                                                         |                    |
| Focal team average winning percentage (Year <sub>t-4</sub> – Year <sub>t-1</sub> ) <sup>d</sup> | 1.909**<br>(0.133) |
| Focal team winning percentage (Week <sub>1</sub> – Week <sub>t-1</sub> ) <sup>d</sup>           | 1.569**<br>(0.066) |
| Focal team win/loss dummy (win = 1) (Week <sub>t</sub> )                                        | 0.016<br>(0.029)   |
| <b>Other signal influence</b>                                                                   |                    |
| Focal team average rank (Year <sub>t-4</sub> – Year <sub>t-1</sub> ) <sup>c</sup>               | -0.0001<br>(0.003) |
| Opponent winning percentage (Week <sub>1</sub> – Week <sub>t</sub> )                            | -0.061<br>(0.059)  |
| Focal team rank (Week <sub>1</sub> – Week <sub>t-1</sub> )                                      | 0.71**<br>(0.006)  |
| Opponent rank (Week <sub>1</sub> – Week <sub>t</sub> )                                          | 0.024**<br>(0.002) |
| Log-likelihood                                                                                  | -44595.203         |

<sup>a</sup> The data for this analysis contain the weekly rankings by each sportswriter for the 12 weeks during the 2008–2009 regular season. Each sportswriter ranks 120 Division A football teams for 12 weeks. Owing to missing data and the one-week lag,  $N = 74,685$  sportswriter-team-week observation

<sup>b</sup>  $+ p < 0.10$ ;  $* p < 0.05$ ;  $** p < 0.01$ . Robust standard errors are estimated by clustering observations for each sportswriter.

<sup>c</sup> The effect of focal team average rank (Year<sub>t-4</sub> – Year<sub>t-1</sub>) is positive when entered without focal team rank (Week<sub>1</sub> – Week<sub>t-1</sub>), but this positive effect disappears when entered with focal team rank (Week<sub>1</sub> – Week<sub>t-1</sub>). This essentially means that the effect of focal team average rank (Year<sub>t-4</sub> – Year<sub>t-1</sub>) is mediated by focal team rank (Week<sub>1</sub> – Week<sub>t-1</sub>).

**APPENDIX B Models Controlling for Two Contest Teams' Winning Percentage ( $N = 865$ )<sup>a</sup>**

| <b>Variables</b>                                                | <b>Unweighted<br/>(<math>t</math>)</b> | <b>Weighted<br/>(<math>t</math>)</b> | <b>Unweighted<br/>(<math>t-3</math> to <math>t</math>)</b> | <b>Weighted<br/>(<math>t-3</math> to <math>t</math>)</b> |
|-----------------------------------------------------------------|----------------------------------------|--------------------------------------|------------------------------------------------------------|----------------------------------------------------------|
| Constant                                                        | 6.845**<br>(0.786)                     | 7.509**<br>(0.797)                   | 7.059**<br>(0.761)                                         | 7.653**<br>(0.791)                                       |
| GDP growth                                                      | -0.091<br>(0.337)                      | -0.002<br>(0.348)                    | -0.147<br>(0.339)                                          | -0.096<br>(0.345)                                        |
| NCAA regulation                                                 | 0.069<br>(0.054)                       | 0.052<br>(0.053)                     | 0.078<br>(0.054)                                           | 0.031<br>(0.055)                                         |
| World War II                                                    | -0.078<br>(0.077)                      | -0.068<br>(0.073)                    | -0.089<br>(0.077)                                          | -0.099<br>(0.076)                                        |
| Household cable TV subscription                                 | -5.835**<br>(2.036)                    | -4.743*<br>(2.246)                   | -5.548**<br>(2.036)                                        | -7.263**<br>(2.617)                                      |
| Bowl Championship Series (BCS)                                  | -0.180**<br>(0.059)                    | -0.249**<br>(0.067)                  | -0.189**<br>(0.059)                                        | -0.322**<br>(0.060)                                      |
| Bowl population density                                         | 0.017**<br>(0.006)                     | 0.018**<br>(0.007)                   | 0.017**<br>(0.006)                                         | 0.024**<br>(0.008)                                       |
| Bowl local density                                              | -0.017<br>(0.017)                      | -0.010<br>(0.018)                    | -0.015<br>(0.017)                                          | -0.012<br>(0.018)                                        |
| Bowl schedule density                                           | 0.008<br>(0.006)                       | 0.005<br>(0.006)                     | 0.008<br>(0.006)                                           | 0.008<br>(0.006)                                         |
| Bowl location                                                   | 0.532**<br>(0.185)                     | 0.501**<br>(0.186)                   | 0.483**<br>(0.174)                                         | 0.491**<br>(0.184)                                       |
| State population                                                | 0.040<br>(0.042)                       | 0.073+<br>(0.042)                    | 0.030<br>(0.041)                                           | 0.063<br>(0.042)                                         |
| State income per capita (/million)                              | 0.000<br>(0.000)                       | 0.000<br>(0.000)                     | 0.000<br>(0.000)                                           | 0.000<br>(0.000)                                         |
| Title sponsorship                                               | 0.148**<br>(0.035)                     | 0.125**<br>(0.037)                   | 0.154**<br>(0.035)                                         | 0.148**<br>(0.036)                                       |
| Conference affiliation                                          | 0.049<br>(0.032)                       | 0.093**<br>(0.033)                   | 0.060+<br>(0.033)                                          | 0.102**<br>(0.034)                                       |
| BCS affiliation                                                 | 0.001<br>(0.047)                       | 0.174**<br>(0.059)                   | 0.047<br>(0.046)                                           | 0.144**<br>(0.054)                                       |
| Name change counts                                              | -0.020+<br>(0.012)                     | -0.026*<br>(0.013)                   | -0.020+<br>(0.011)                                         | -0.024+<br>(0.013)                                       |
| Contest school enrollment                                       | 0.051<br>(0.038)                       | 0.031<br>(0.037)                     | 0.047<br>(0.038)                                           | 0.023<br>(0.037)                                         |
| Bowl age                                                        | 0.034**<br>(0.010)                     | 0.026*<br>(0.010)                    | 0.035**<br>(0.010)                                         | 0.028**<br>(0.010)                                       |
| Bowl status                                                     | 0.080**<br>(0.022)                     | 0.053*<br>(0.022)                    | 0.079**<br>(0.022)                                         | 0.051*<br>(0.022)                                        |
| Bowl status inequality 1 ( $\leq$ middle)                       | 2.080**<br>(0.719)                     | 0.964<br>(0.714)                     | 2.145**<br>(0.726)                                         | 1.077<br>(0.702)                                         |
| Bowl status inequality 2 ( $>$ middle)                          | -2.070**<br>(0.450)                    | -2.128**<br>(0.448)                  | -2.216**<br>(0.452)                                        | -2.263**<br>(0.454)                                      |
| Bowl status inequality 1 $\times$ bowl status                   | -0.131**<br>(0.047)                    | -0.074<br>(0.048)                    | -0.131**<br>(0.047)                                        | -0.072<br>(0.047)                                        |
| Bowl status inequality 2 $\times$ bowl status                   | 0.142**<br>(0.027)                     | 0.168**<br>(0.028)                   | 0.153**<br>(0.028)                                         | 0.157**<br>(0.029)                                       |
| Bowl status $\times$ bowl age                                   | -0.002**<br>(0.001)                    | -0.001*<br>(0.001)                   | -0.002**<br>(0.001)                                        | -0.001*<br>(0.001)                                       |
| Bowl status inequality 1 $\times$ bowl age                      | -0.048*<br>(0.021)                     | -0.034<br>(0.022)                    | -0.052*<br>(0.021)                                         | -0.039+<br>(0.021)                                       |
| Bowl status inequality 2 $\times$ bowl age                      | 0.064**<br>(0.019)                     | 0.064**<br>(0.019)                   | 0.071**<br>(0.019)                                         | 0.061**<br>(0.020)                                       |
| Bowl status inequality 1 $\times$ bowl status $\times$ bowl age | 0.003*<br>(0.001)                      | 0.002<br>(0.001)                     | 0.003*<br>(0.001)                                          | 0.002<br>(0.001)                                         |
| Bowl status inequality 2 $\times$ bowl status $\times$ bowl age | -0.003**<br>(0.001)                    | -0.004**<br>(0.001)                  | -0.004**<br>(0.001)                                        | -0.003**<br>(0.001)                                      |
| <b>Controlling for Contest Team Winning Percentage</b>          |                                        |                                      |                                                            |                                                          |
| Contest team 1's winning percentage                             | 0.445*<br>(0.183)                      | 0.026**<br>(0.006)                   | 0.675**<br>(0.203)                                         | 0.033**<br>(0.007)                                       |
| Contest team 2's winning percentage                             | 0.504**<br>(0.181)                     | 0.015**<br>(0.005)                   | 0.717**<br>(0.190)                                         | 0.025**<br>(0.006)                                       |
| Contest team 1 $\times$ contest team 2                          | -0.245<br>(0.290)                      | -0.002**<br>(0.000)                  | -0.833*<br>(0.364)                                         | -0.003**<br>(0.000)                                      |
| R <sup>2</sup>                                                  | 0.62                                   | 0.60                                 | 0.61                                                       | 0.61                                                     |
| $\chi^2$                                                        | 922.55                                 | 834.80                               | 952.52                                                     | 800.56                                                   |

<sup>a</sup> +  $p < 0.10$ ; \*  $p < 0.05$ ; \*\*  $p < 0.01$ . Robust standard errors are in parentheses. Two-tailed tests for all variables.  $N = 865$ .
